# Supplementary material
Source: publisher site journal article supplement (https://www.spandidos-publications.com/2790/downloadSupplementary)

Figure S1. Cytokine/chemokine profiles in OVCAFs-CM. The cytokine/chemokine profiles in the secretion of OVCAF compared with pooled 6 cases of OVNFs were determined using the Bio-plex Pro Human Cytokine Standard 27-Plex kit including 27 cytokines (IL-1 $\beta$ , IL-1ra, IL-2, IL-4, IL-5, IL-6, IL-7, IL-8, IL-9, IL-10, IL-12p70, IL-13, IL-15, IL-17A, eotaxin, bFGF, G-CSF, GM-CSF, IFN- $\gamma$ , IP-10, MCP-1, MIP-1 $\alpha$ , MIP-1 $\beta$ , PDGF-BB, RANTES, TNF- $\alpha$  and VEGF). Only 10 cytokines were detected as shown in the graph. ANOVA with Tukey's post hoc test was used to analyze the data and revealed a significant difference compared the control pooled OVNFs, \*P<0.05, \*\*P<0.01. OVNFs, ovarian non-tumor-associated fibroblasts; OVCAFs, ovarian cancer-associated fibroblasts; IL, interleukin; bFGF, basic fibroblast growth factor; GM-SCF, granulocyte-monocyte-colony stimulating factor; IFN- $\gamma$ , interferon- $\gamma$ ; IP-10, interferon- $\gamma$ -induced protein 10; MCP-1, monocyte chemoattractant protein-1; MIP-1 $\alpha$ , monocyte inhibiting protein-1 $\alpha$ ; MIP-1 $\beta$ , monocyte inhibiting protein-1 $\beta$ ; PDGF-BB, platelet-derived growth factor-BB; RANTES, regulated on activation, normal T cell expressed and secreted; TNF- $\alpha$ , tumor-necrosis factor- $\alpha$ ; VEGF, vascular endothelial growth factor.

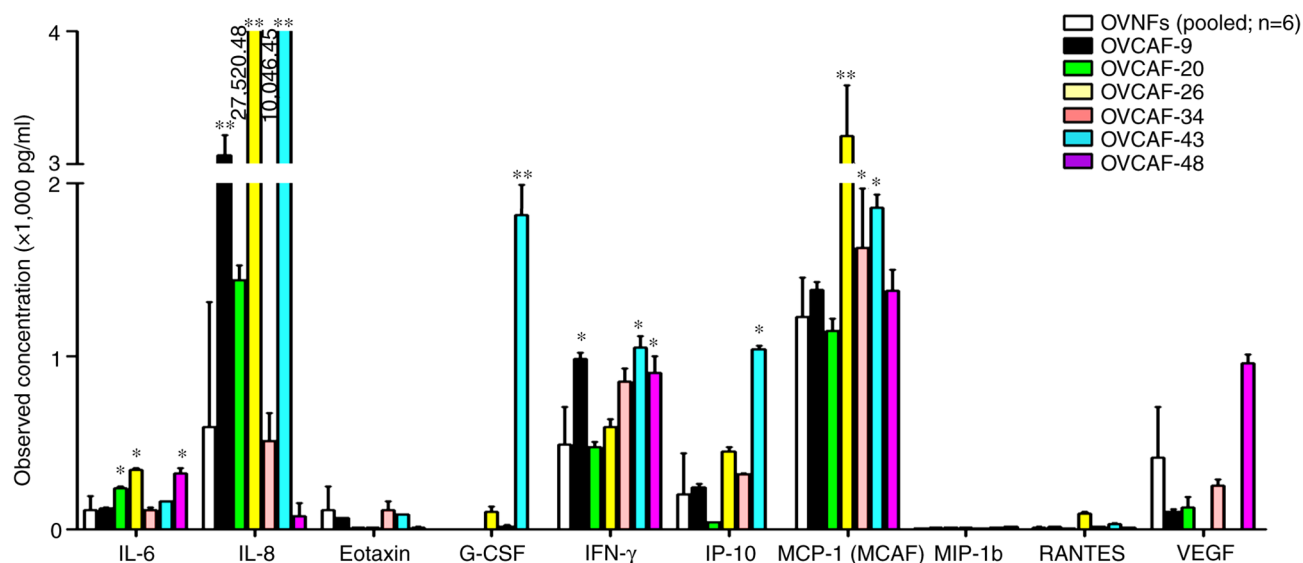

Supplement: Supplementary file 1 [file downloadSupplementary]
